# Supplementary material for: A new approach to assess the impact of extreme temperatureconditions on social vulnerability
Source: Copernicus journal article supplement (doi:10.5194/nhess-2021-45), 2021-03-16
Supplement: Supplementary file 1 [file nhess-2021-45-supplement.pdf]

# Supplementary material 1.

## Spatial distribution of extreme temperature indices in Cluj County

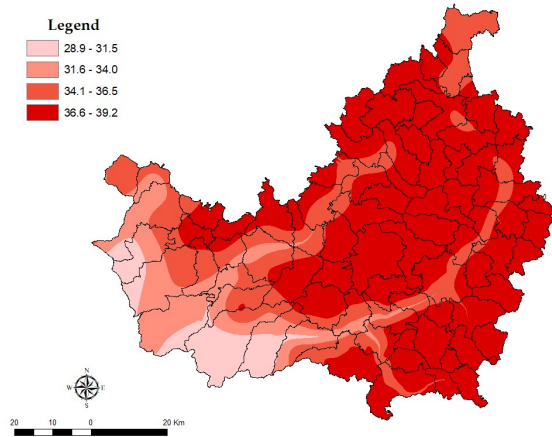

Fig. SM\_1. Historical maximum temperature (°C)

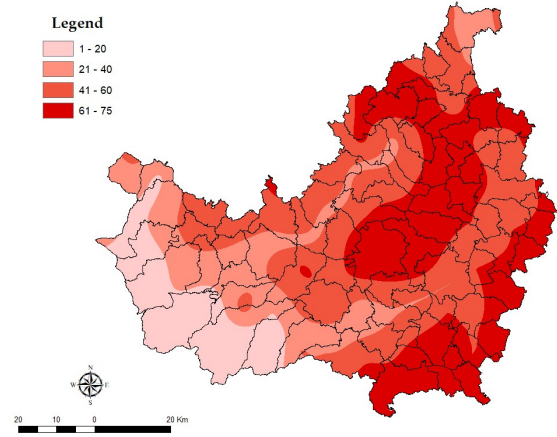

Fig. SM\_2. Mean annual number of summer days

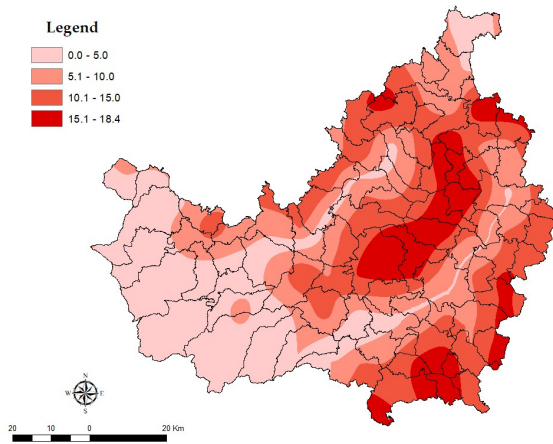

Fig. SM\_3. Mean annual number of tropical days

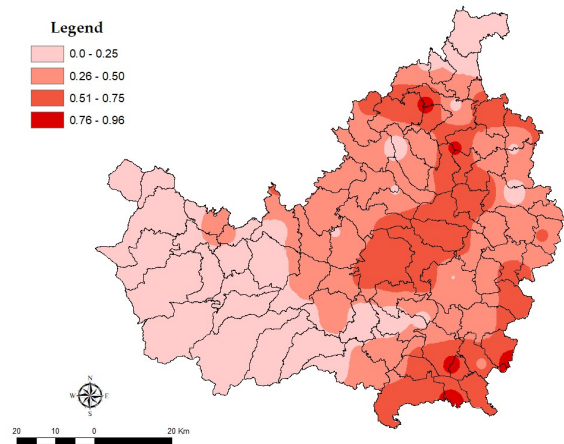

Fig. SM\_4. Maximum annual number of hot days

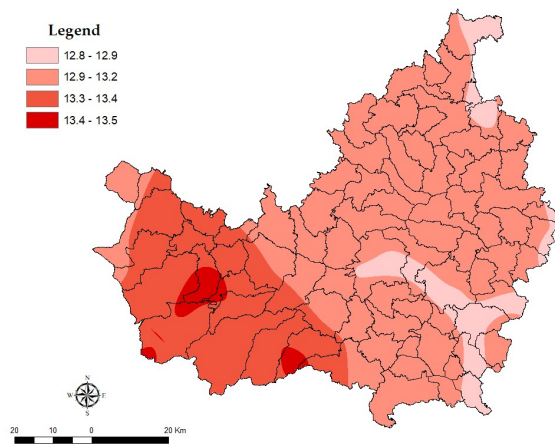

Fig. SM\_5. Percentage of very hot days

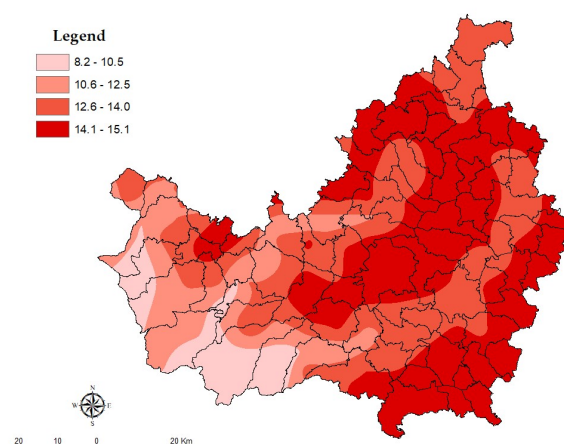

Fig. SM\_6. Mean value of daily maximum temperature (°C)

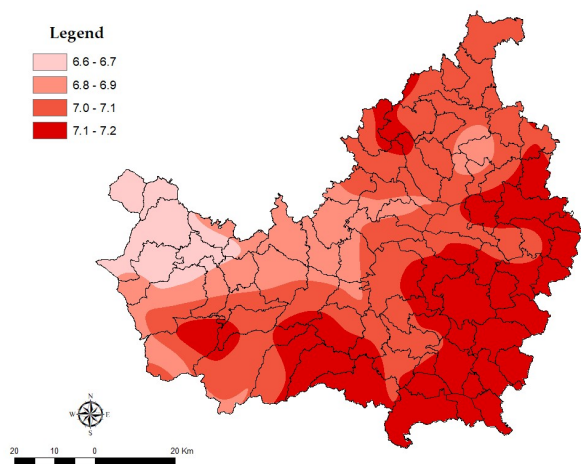

Fig. SM\_7. Mean duration of a heat wave event (days)

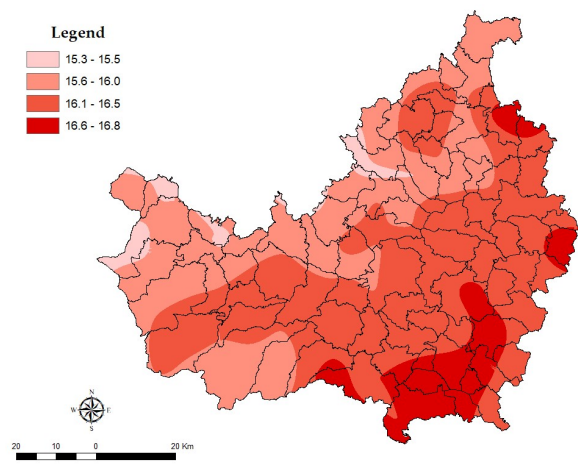

Fig. SM\_8. Mean annual frequency (cumulative duration) of heat waves (days)

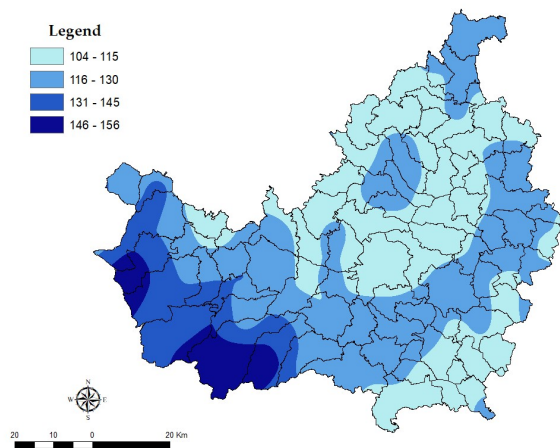

Fig. SM\_9. Mean annual number of frost days

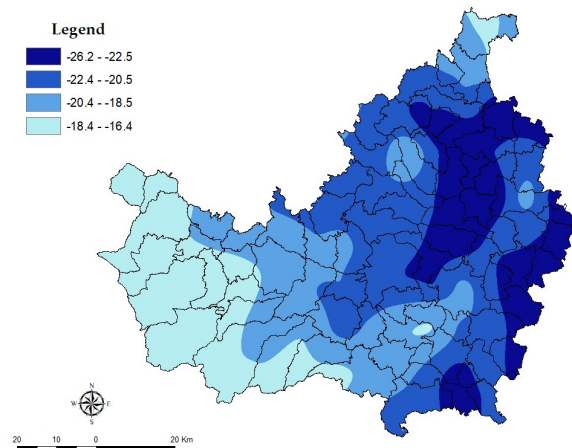

Fig. SM\_10. Intensity of a cold wave event

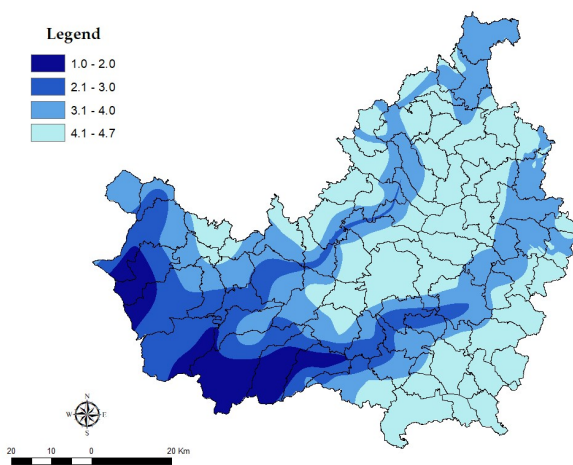

Fig. SM\_11. Mean annual value of daily minimum temperature ( $^{\circ}\text{C}$ )

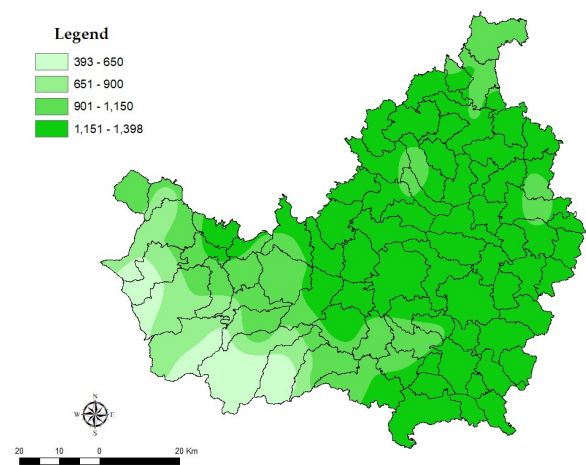

Fig. SM\_12. Growing degree days ( $^{\circ}\text{C}$ )
